# Supplementary material
Source: PubMed Central journal article supplement (PMC5835389)
Supplement: NIHMS945625-supplement-Supplementary_data.pdf [file NIHMS945625-supplement-Supplementary_data.pdf]

## Supplementary data

### Conformational stability of the epidermal growth factor (EGF) receptor as influenced by glycosylation, dimerization and EGF hormone binding

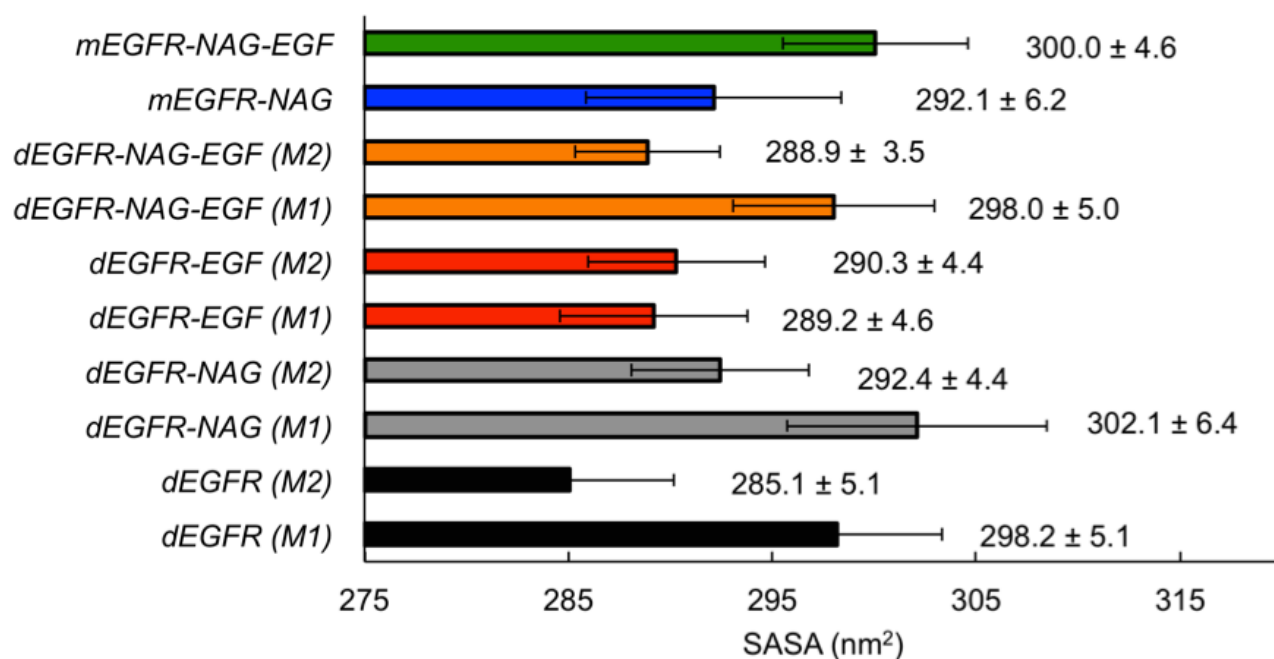

**Figure S1.** Average solvent accessible surface area (SASA) of each EGFR system. Values at ends of bars are an average of the 50 ns MD simulation ( $\pm$  SD). M1 = Monomer 1; M2 = Monomer 2. *dEGFR* = dimeric EGFR; *dEGFR<sup>NAG</sup>* = dimeric, glycosylated EGFR; *dEGFR<sup>EGF</sup>* = dimeric, ligand-bound EGFR; *dEGFR<sup>NAG-EGF</sup>* = dimeric, glycosylated, ligand-bound EGFR; *mEGFR<sup>NAG</sup>* = monomeric, glycosylated EGFR; and *mEGFR<sup>NAG-EGF</sup>* = monomeric, glycosylated, ligand-bound EGFR.

**Table S1.** Summary of secondary structural properties of simulated EGFR.

| System               | Residues | Structural Properties<br>% average ( $\pm$ SD) |                |            |            | SASA<br>at 50 ns<br>(M1, M2) |
|----------------------|----------|------------------------------------------------|----------------|------------|------------|------------------------------|
|                      |          | $\alpha$ -helix                                | $\beta$ -sheet | coil       | turn       | <i>nm</i>                    |
| <i>dEGFR</i>         | 1020     | 5.6 (0.8)                                      | 23.1 (1.2)     | 32.7 (0.9) | 11.1 (1.4) | 301.3, 279.9                 |
| <i>dEGFR-NAG</i>     | 1020     | 3.9 (0.6)                                      | 23.2 (2.3)     | 34.3 (1.3) | 11.1 (1.3) | 295.5, 283.0                 |
| <i>dEGFR-EGF</i>     | 1020     | 3.8 (0.6)                                      | 22.1 (1.3)     | 33.3 (1.4) | 12.2 (1.2) | 293.2, 293.9                 |
| <i>dEGFR-NAG-EGF</i> | 1020     | 5.1 (0.8)                                      | 20.9 (1.0)     | 33.6 (0.9) | 11.6 (1.1) | 296.7, 282.8                 |
| <i>mEGFR-NAG</i>     | 510      | 3.3 (1.3)                                      | 20.1 (1.6)     | 37.1 (2.3) | 10.5 (2.0) | 296.0                        |
| <i>mEGFR-NAG-EGF</i> | 510      | 5.0 (1.4)                                      | 21.3 (1.9)     | 34.1 (1.3) | 10.1 (1.6) | 300.5                        |

SASA = solvent accessible surface area, M1 = Monomer 1, and M2 = Monomer 2. *dEGFR* = dimeric EGFR; *dEGFR<sup>NAG</sup>* = dimeric, glycosylated EGFR; *dEGFR<sup>EGF</sup>* = dimeric, ligand-bound EGFR; *dEGFR<sup>NAG-EGF</sup>* = dimeric, glycosylated, ligand-bound EGFR; *mEGFR<sup>NAG</sup>* = monomeric, glycosylated EGFR; and *mEGFR<sup>NAG-EGF</sup>* = monomeric, glycosylated, ligand-bound EGFR.
